# Supplementary material for: Biology Needs Evolutionary Software Tools: Let’s Build Them Right
Source: PubMed Central journal article supplement (PMC5967460; doi:10.1093/molbev/msy084), 2018-04-23
Supplement: msy084_supp.pdf [file msy084_supp.pdf]

| Paper                                                                                     | Source                                                                              | Is in Conda? | Notes                                                 | Resource Name         | Resource Link                                                                                         | Web or Desktop |
|-------------------------------------------------------------------------------------------|-------------------------------------------------------------------------------------|--------------|-------------------------------------------------------|-----------------------|-------------------------------------------------------------------------------------------------------|----------------|
| <a href="https://doi.org/10.1093/molbev/msw210">https://doi.org/10.1093/molbev/msw210</a> | <a href="http://cran.R-project.org">http://cran.R-project.org</a>                   | no           | Broken link in the paper                              | haploReconstruct: Re  | <a href="https://cran.r-project.org/">https://cran.r-project.org/</a>                                 | Desktop        |
| <a href="https://doi.org/10.1093/molbev/msw217">https://doi.org/10.1093/molbev/msw217</a> | github                                                                              | no           |                                                       | PANGEA Phylodynam     | <a href="https://github.com/Pangea">https://github.com/Pangea</a>                                     | Desktop        |
| <a href="https://doi.org/10.1093/molbev/msw220">https://doi.org/10.1093/molbev/msw220</a> | github                                                                              | no           | Broken link in the paper                              | PhyloBayes-MPI        | <a href="https://github.com/bayes">https://github.com/bayes</a>                                       | Desktop        |
| <a href="https://doi.org/10.1093/molbev/msw227">https://doi.org/10.1093/molbev/msw227</a> | github                                                                              | no           |                                                       | CTDGFinder            | <a href="https://github.com/biofilc">https://github.com/biofilc</a>                                   | Desktop        |
| <a href="https://doi.org/10.1093/molbev/msw211">https://doi.org/10.1093/molbev/msw211</a> | github                                                                              | no           | very nice site                                        | SLIM                  | <a href="https://messerlab.org/slim">https://messerlab.org/slim</a>                                   | Desktop        |
| <a href="https://doi.org/10.1093/molbev/msw252">https://doi.org/10.1093/molbev/msw252</a> | github                                                                              | no           | bad readme, figure links broken on MBE website        | IMGui                 | <a href="https://github.com/jaredg">https://github.com/jaredg</a>                                     | Desktop        |
| <a href="https://doi.org/10.1093/molbev/msw267">https://doi.org/10.1093/molbev/msw267</a> |                                                                                     | no           | not really a tool paper                               |                       |                                                                                                       |                |
| <a href="https://doi.org/10.1093/molbev/msw260">https://doi.org/10.1093/molbev/msw260</a> | github                                                                              | no           | very nice manual                                      | PartitionFinder 2     | <a href="http://www.robertlanfear">http://www.robertlanfear</a>                                       | Desktop        |
| <a href="https://doi.org/10.1093/molbev/msw275">https://doi.org/10.1093/molbev/msw275</a> | github                                                                              | no           | R package, very nice manual                           | TransPhylo            | <a href="https://github.com/xavier">https://github.com/xavier</a>                                     | Desktop        |
| <a href="https://doi.org/10.1093/molbev/msx055">https://doi.org/10.1093/molbev/msx055</a> | github                                                                              | no           | tool comparison, github contains datasets and scripts |                       | <a href="https://github.com/stamatak/tree-viz-issues">https://github.com/stamatak/tree-viz-issues</a> |                |
| <a href="https://doi.org/10.1093/molbev/msx089">https://doi.org/10.1093/molbev/msx089</a> | pip/github                                                                          | no           |                                                       | BuddySuite            | <a href="https://research.nhgri.nih">https://research.nhgri.nih</a>                                   | Desktop        |
| <a href="https://doi.org/10.1093/molbev/msx116">https://doi.org/10.1093/molbev/msx116</a> | unclear                                                                             | no           | Confusing disclaimer                                  | TimeTree              | <a href="http://www.timetree.org/">http://www.timetree.org/</a>                                       | Web            |
| <a href="https://doi.org/10.1093/molbev/msx124">https://doi.org/10.1093/molbev/msx124</a> | github                                                                              | no           | data is at github                                     | genPomp               | <a href="https://github.com/kinga">https://github.com/kinga</a>                                       | Desktop        |
| <a href="https://doi.org/10.1093/molbev/msx137">https://doi.org/10.1093/molbev/msx137</a> | <a href="https://sites.google.com/site/cbic">https://sites.google.com/site/cbic</a> | no           | source download link dead                             | ETDBN                 | <a href="http://www.computingfor">http://www.computingfor</a>                                         | Desktop        |
| <a href="https://doi.org/10.1093/molbev/msx126">https://doi.org/10.1093/molbev/msx126</a> | github                                                                              | no           |                                                       | StarBEAST2            | <a href="https://github.com/genom">https://github.com/genom</a>                                       | Desktop        |
| <a href="https://doi.org/10.1093/molbev/msx148">https://doi.org/10.1093/molbev/msx148</a> | github / website                                                                    | no           |                                                       | eggNOG-Mapper         | <a href="http://eggnogdb.embl.de">http://eggnogdb.embl.de</a>                                         | Both           |
| <a href="https://doi.org/10.1093/molbev/msx191">https://doi.org/10.1093/molbev/msx191</a> | github                                                                              | no           |                                                       | Bad Clade Deletion (E | <a href="https://bio.informatik.uni">https://bio.informatik.uni</a>                                   | Desktop        |
| <a href="https://doi.org/10.1093/molbev/msx149">https://doi.org/10.1093/molbev/msx149</a> | PhyML                                                                               | yes          |                                                       | Smart Model Selectio  | <a href="http://www.atgc-montpel">http://www.atgc-montpel</a>                                         | Both           |
| <a href="https://doi.org/10.1093/molbev/msx200">https://doi.org/10.1093/molbev/msx200</a> | github                                                                              | yes          | a new method by combining other methods, no           | Ray Surveyor          | <a href="https://github.com/zorinc">https://github.com/zorinc</a>                                     | Desktop        |
| <a href="https://doi.org/10.1093/molbev/msx186">https://doi.org/10.1093/molbev/msx186</a> | github                                                                              | no           |                                                       | The Structured Coale  | <a href="https://github.com/nicfel">https://github.com/nicfel</a>                                     | Desktop        |
| <a href="https://doi.org/10.1093/molbev/msx195">https://doi.org/10.1093/molbev/msx195</a> | github                                                                              | no           |                                                       | EpiGenMCMC            | <a href="https://github.com/lucym">https://github.com/lucym</a>                                       | Desktop        |
| <a href="https://doi.org/10.1093/molbev/msx209">https://doi.org/10.1093/molbev/msx209</a> | github                                                                              | no           |                                                       | BetaScan              | <a href="https://github.com/ksiewi">https://github.com/ksiewi</a>                                     | Desktop        |
| <a href="https://doi.org/10.1093/molbev/msx225">https://doi.org/10.1093/molbev/msx225</a> | github/R                                                                            | no           |                                                       | poolSeq               | <a href="https://github.com/Thom">https://github.com/Thom</a>                                         | Desktop        |
| <a href="https://doi.org/10.1093/molbev/msx259">https://doi.org/10.1093/molbev/msx259</a> | github                                                                              | no           |                                                       | STRIDE                | <a href="https://github.com/david">https://github.com/david</a>                                       | Desktop        |
| <a href="https://doi.org/10.1093/molbev/msx235">https://doi.org/10.1093/molbev/msx235</a> | github                                                                              | no           |                                                       | PhyloNetworks         | <a href="https://github.com/crsl4/">https://github.com/crsl4/</a>                                     | Desktop        |
